# Supplementary material for: A highly conducting mixed-valence nickel bis(dithiolene) salt [Et4N][Ni(Me-thiazSe-dt)2]2 with selone substitution
Source: Royal Society of Chemistry journal article supplement (doi:10.1039/d3dt00767g), 2023-01-01
Supplement: d3dt00767g1.pdf [file d3dt00767g1.pdf]

## **A highly conducting mixed-valence nickel bis(dithiolene) salt [Et<sub>4</sub>N][Ni(Me-thiazSe-dt)<sub>2</sub>]<sub>2</sub> with selone substitution**

Hadi Hachem, Olivier Jeannin, Hengbo Cui, Reizo Kato, Marc Fourmigué\* and Dominique Lorcy\*

### **SUPPLEMENTARY INFORMATION**

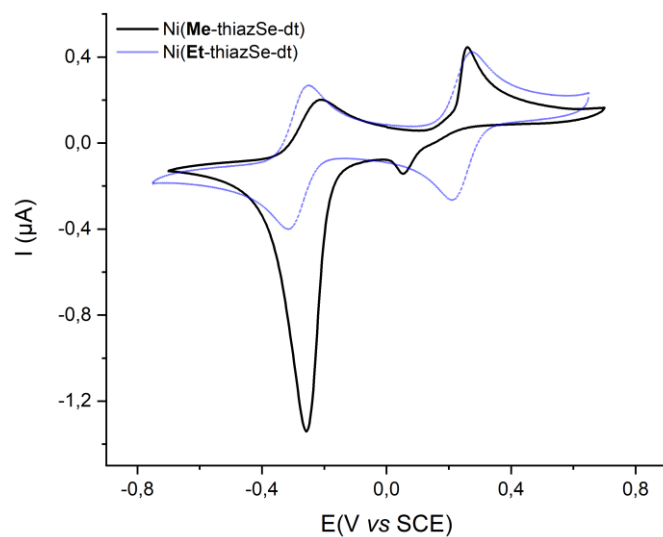

**Fig. S1** Cyclic voltammety of the anionic complex  $[\text{NBu}_4][\text{Ni}(\text{Me-thiazSe-dt})_2]$  (black line), and the more soluble  $[\text{NBu}_4][\text{Ni}(\text{Et-thiazSe-dt})_2]$  in blue as reference (Taken from ref S1).

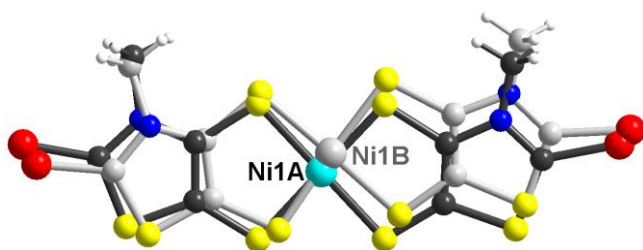

**Fig. S2** Detail of the disorder model refined for  $[\text{Ni}(\text{Me-thiazSe-dt})_2]^{2-}$  in its  $\text{Bu}_4\text{N}^+$  salt. The major component (85% occupation) is highlighted with black bonds, the minor one (15%) with light grey bonds.

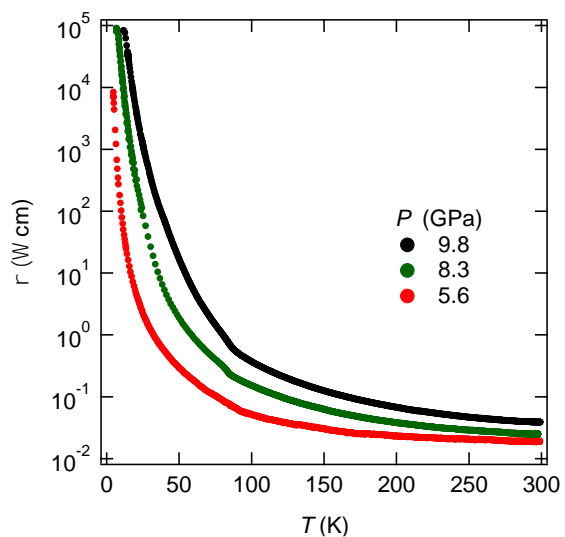

**Fig. S3** Temperature and pressure dependence of the resistivity of the mixed-valence salt  $[\text{NEt}_4][\text{Ni}(\text{Me-thiazSe-dt})_2]_2$  in the high pressure range

#### Reference

- 1 H. Hachem, H.-B. Cui, R. Kato, O. Jeannin, F. Barrière, M. Fourmigué and D. Lorcy, *Inorg. Chem.*, 2021, **60**, 7876–7886
